# Supplementary material for: Two-dimensional porous Co3O4nanosheets for high-performance lithium ion batteries
Source: Royal Society of Chemistry journal article supplement (doi:10.1039/c7nj03415f), 2017-01-01
Supplement: c7nj03415f1.pdf [file c7nj03415f1.pdf]

# Supporting Information

## Two-dimensional porous $\text{Co}_3\text{O}_4$ nanosheets for high-performance lithium ion batteries

Li Li<sup>a,\*</sup>, Gaoxue Jiang<sup>a</sup>, Runzhi Sun<sup>a</sup>, Bingqiang Cao<sup>a, b,\*</sup>

<sup>a</sup> Laboratory of Inorganic Energy and Environment Materials, School of Materials

Science and Engineering, University of Jinan, Jinan 250022, Shandong, China

<sup>b</sup> Department of Physics and Institute of Laser, Qufu Normal University, Qufu 273165,

Shandong, China

Corresponding-Author: E-mail: mse\_lil@ujn.edu.cn

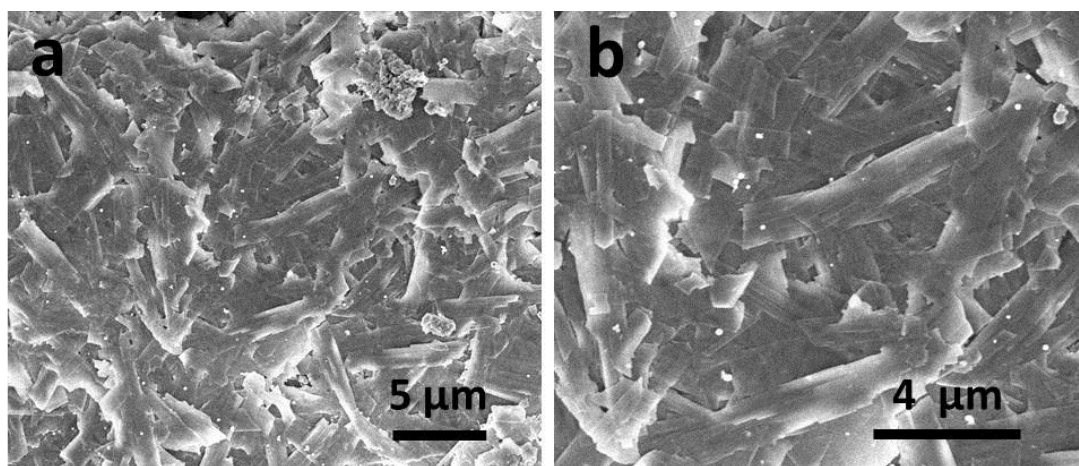

**Fig. S1** SEM images of the Co-precursors.

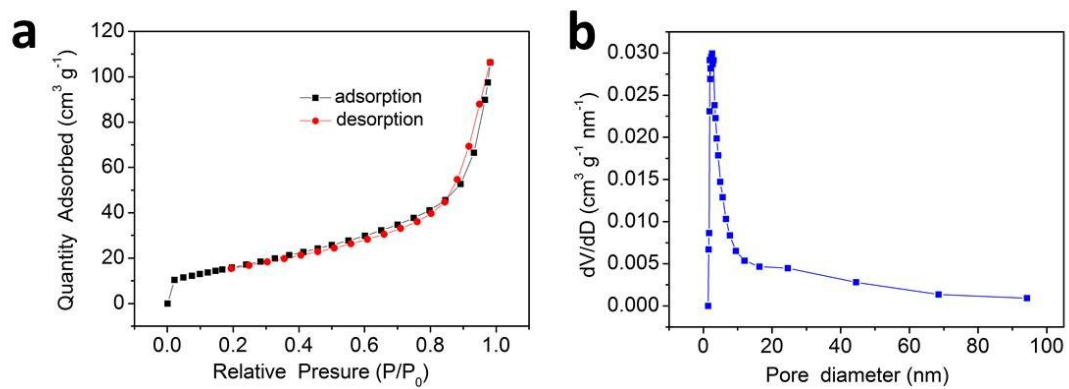

**Fig. S2.** (a)  $\text{N}_2$  adsorption-desorption isotherms and (b) BJH pore size distribution plots for the as-obtained  $\text{Co}_3\text{O}_4$  nanosheets.

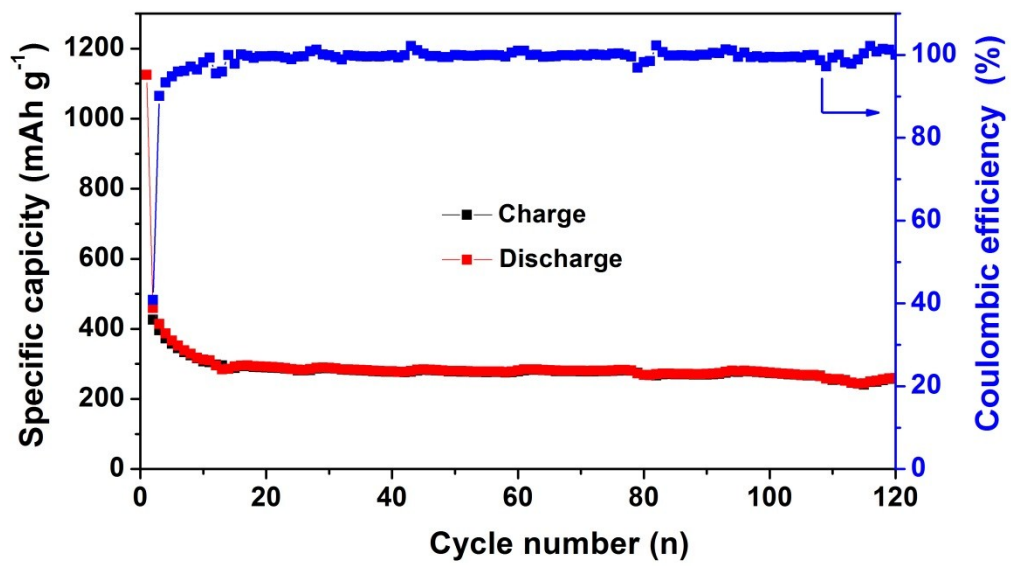

Fig. S3 Cycling performance of the commercial  $\text{Co}_3\text{O}_4$ .

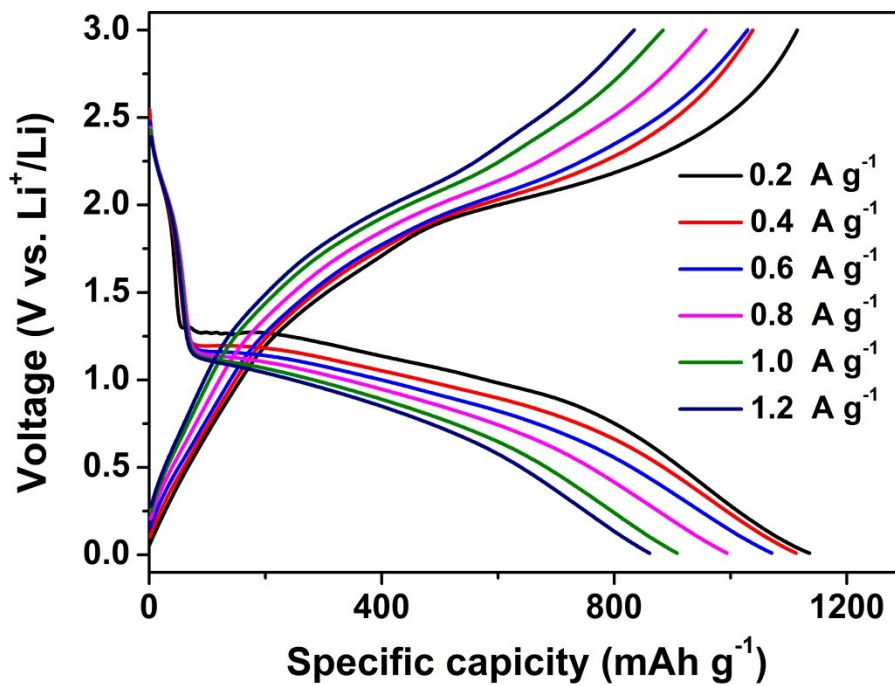

Fig. S4 Galvanostatic curves of 2D porous  $\text{Co}_3\text{O}_4$  nanosheets at different rates.
